# Supplementary material
Source: PubMed Central journal article supplement (PMC5848313)
Supplement: cix634_suppl_86881_appendix.pdf [file cix634_suppl_86881_appendix.pdf]

## Appendix: Antibiotics included in the analysis

| <b>ANTIBIOTIC</b>                        | <b>Number of Formulation</b> |
|------------------------------------------|------------------------------|
| Amoxicillin                              | 9                            |
| Azithromycin                             | 6                            |
| Cefaclor                                 | 2                            |
| Cefadroxil                               | 3                            |
| Cefdinir                                 | 3                            |
| Cefpodoxime                              | 2                            |
| Cefuroxime                               | 2                            |
| Cephalexin                               | 4                            |
| Ciprofloxacin                            | 3                            |
| Clarithromycin                           | 5                            |
| Clindamycin                              | 3                            |
| Dicloxacillin                            | 2                            |
| Doxycycline                              | 11                           |
| Erythromycin                             | 4                            |
| Levofloxacin                             | 3                            |
| Linezolid                                | 2                            |
| Minocycline                              | 5                            |
| Monurol (Fosfomicin trometamol)          | 1                            |
| Moxifloxacin                             | 1                            |
| Nitrofurantoin monohydrate/macrocrystals | 3                            |
| Penicillin VK                            | 4                            |
| TMP-SMX (sulfamethoxazole; trimethoprim) | 3                            |
